# Supplementary material
Source: PubMed Central journal article supplement (PMC11104786)
Supplement: 18_2020_3471_MOESM2_ESM.pdf [file 18_2020_3471_MOESM2_ESM.pdf]

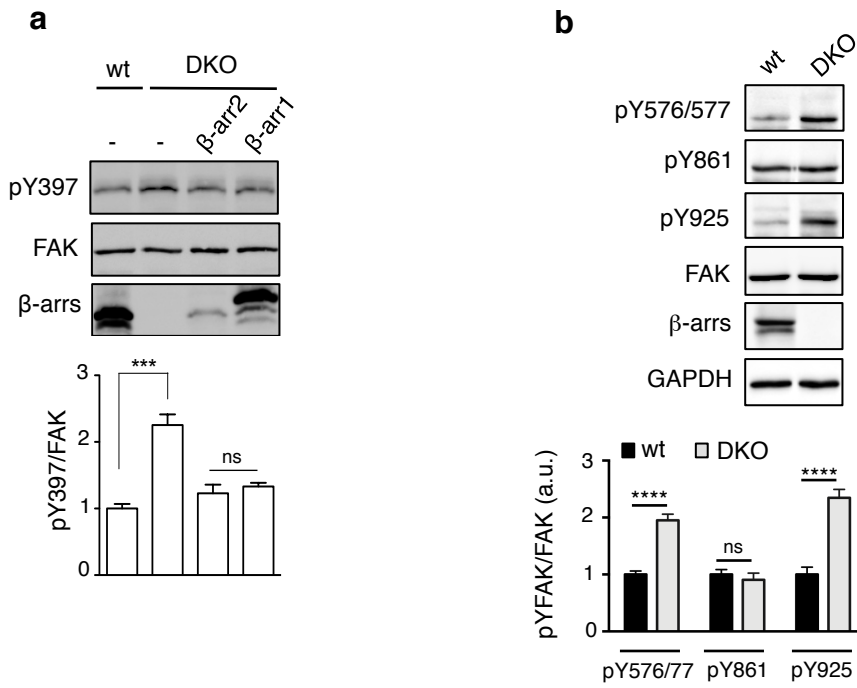

Supplementary Figure 1  
Alexander et al- Ensen

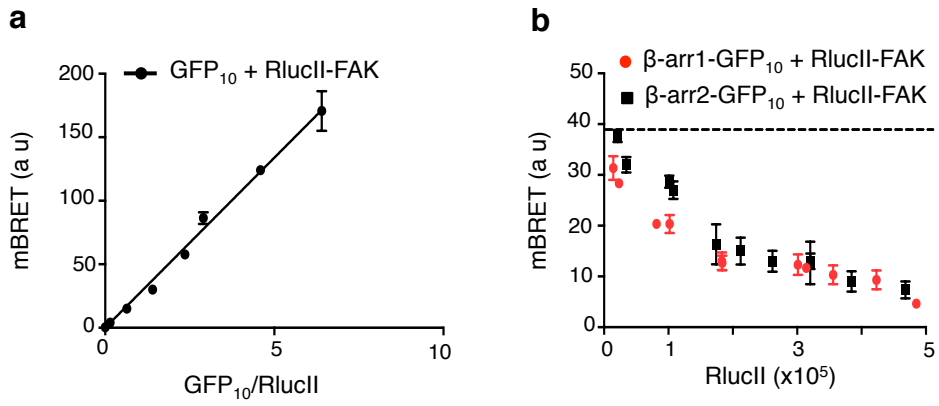

**Supplementary Figure 2**  
**Alexander et al- Ensen**

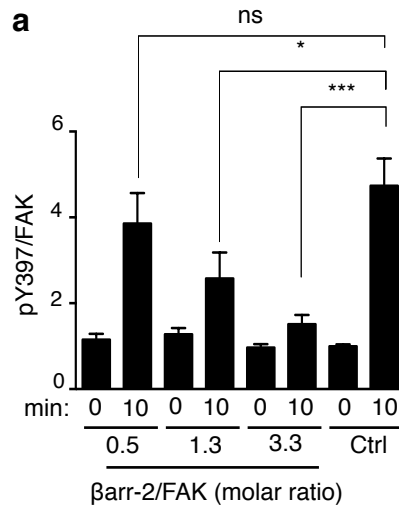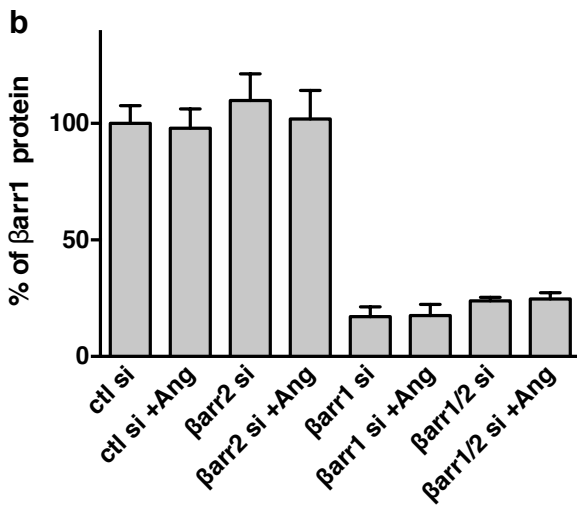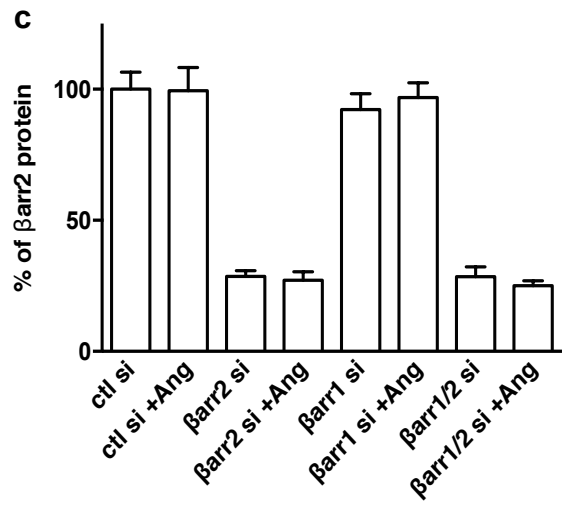

Supplementary Figure 3  
Alexander et al- Enslin

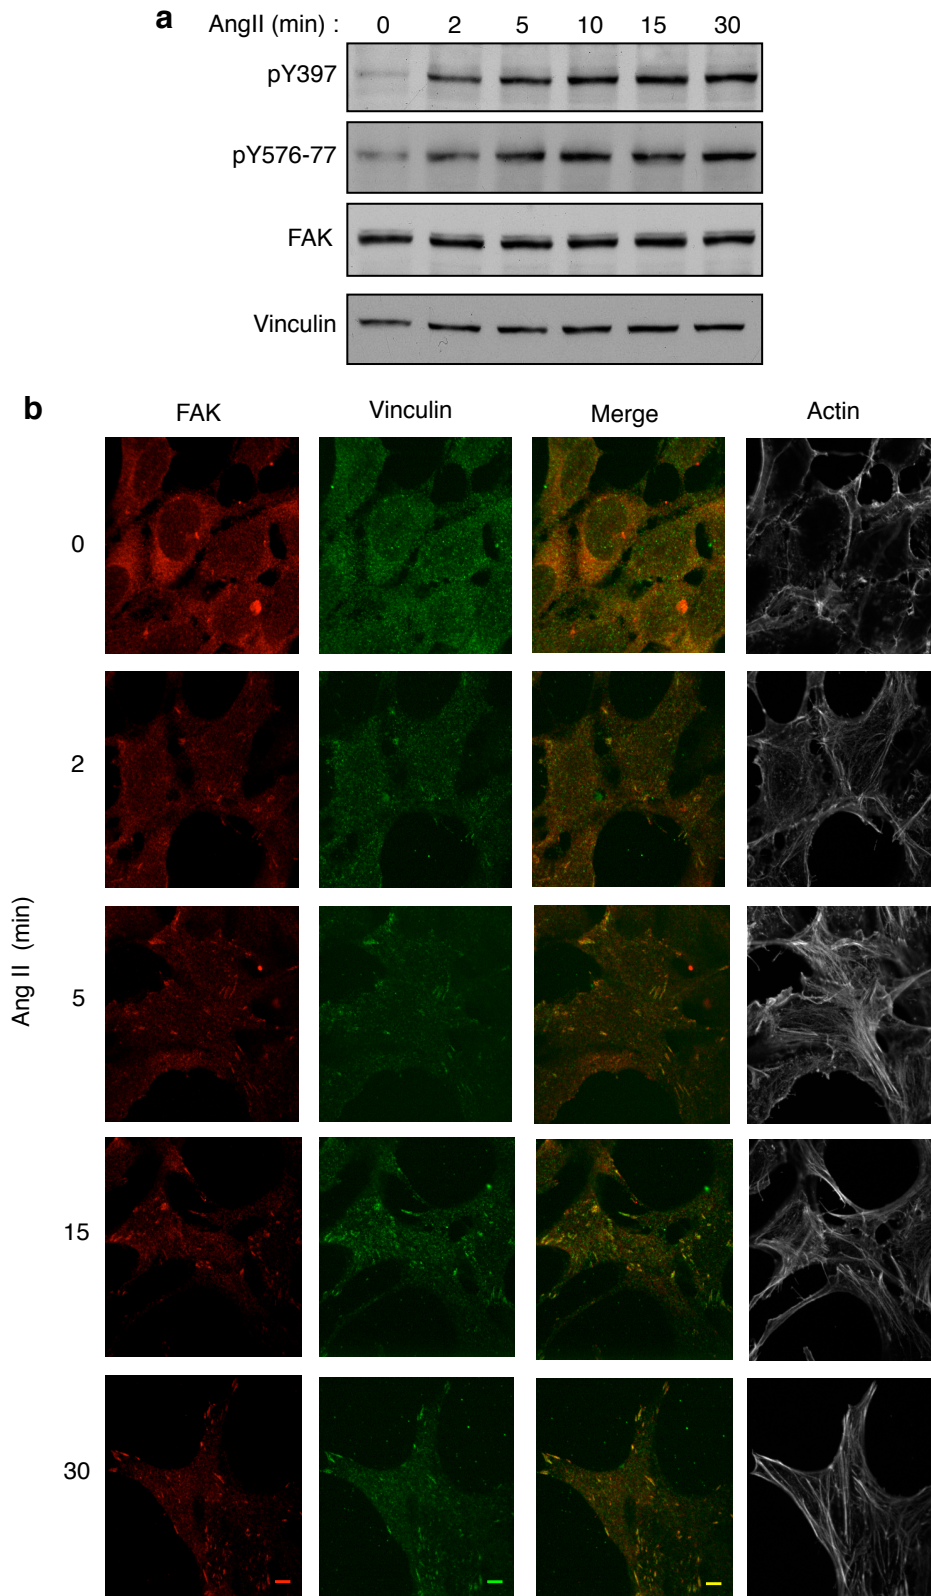

Supplementary Figure 4  
Alexander et al- Enslin

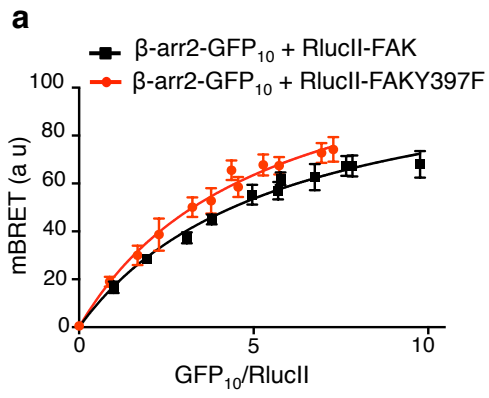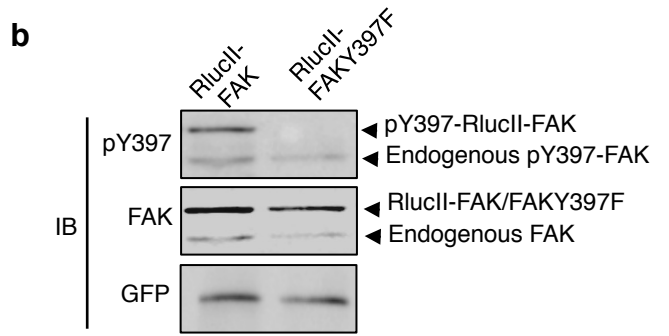

Supplementary Figure 5  
 Alexander et al- Enslin

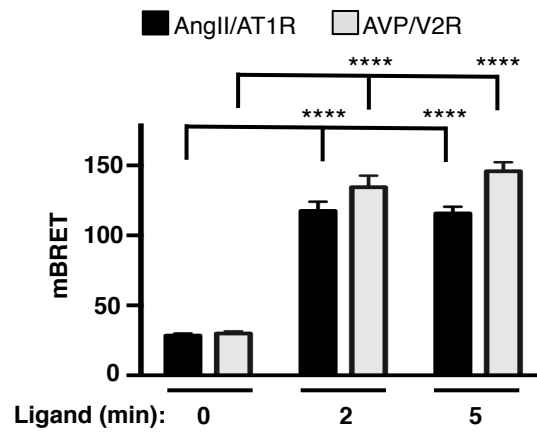

**Supplementary Figure 6**  
**Alexander et al- Enslin**

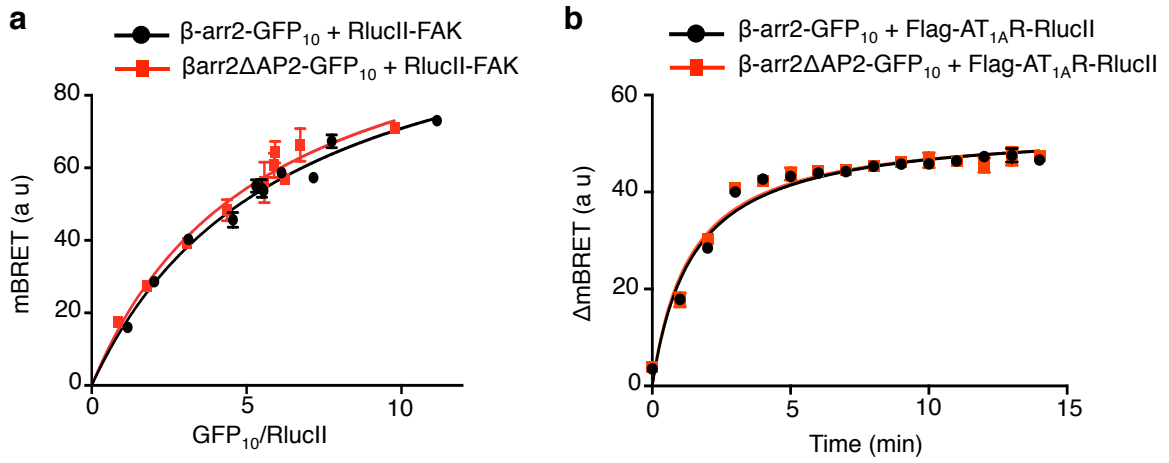

Supplementary Figure 7  
Alexander et al- Ensen

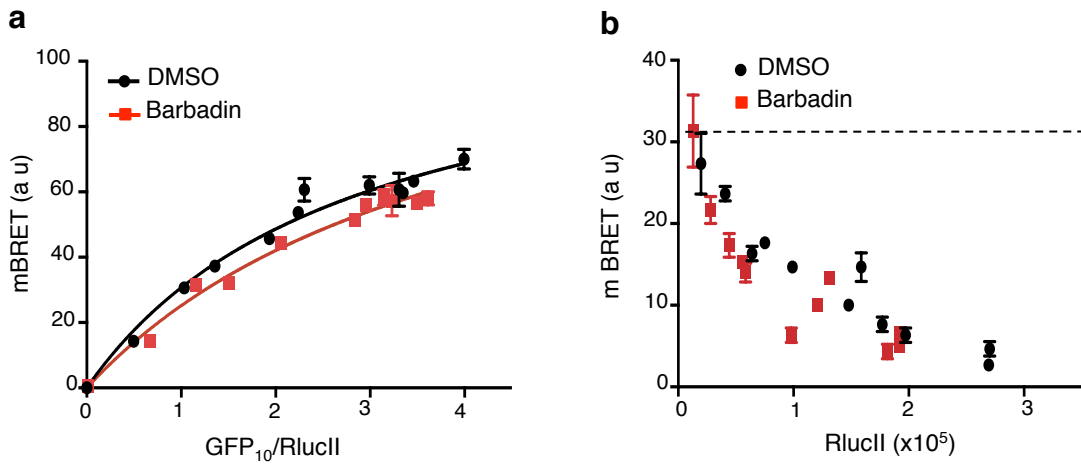

Supplementary Figure 8  
Alexander et al- Ensen



**a**

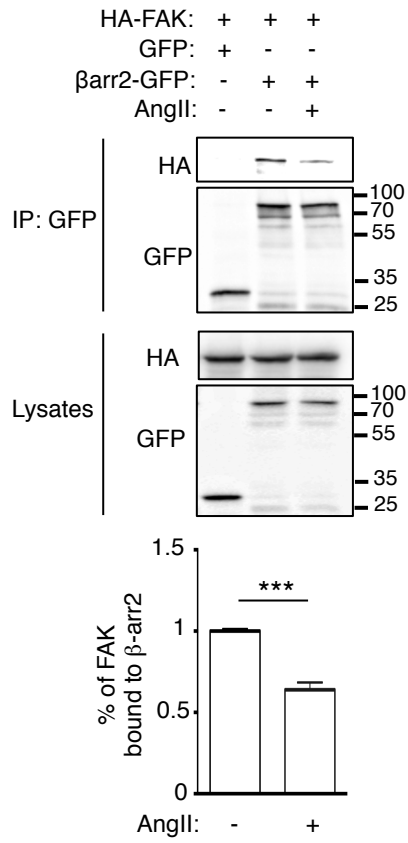

**b**

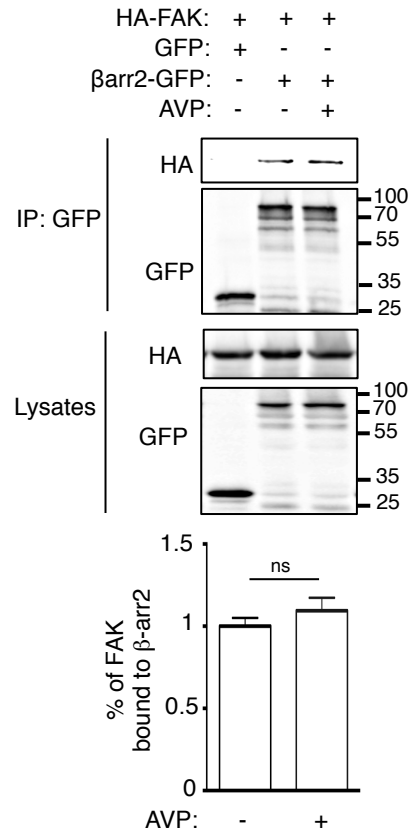

**Supplementary Figure 9**  
Alexander et al- Enslin

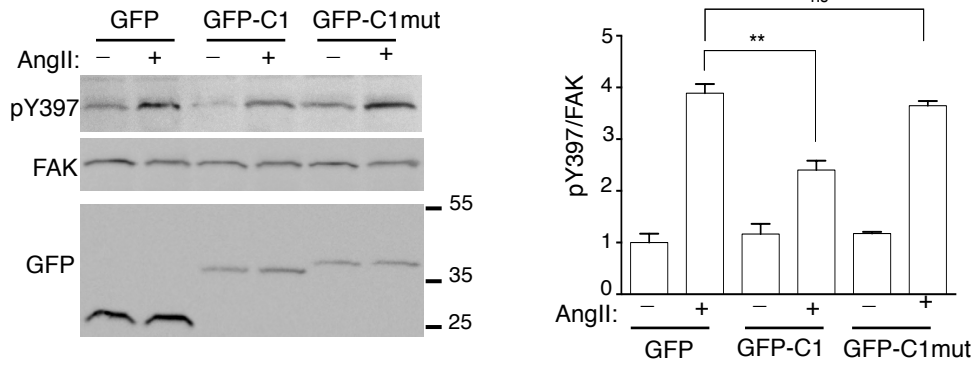

**Supplementary Figure 10**  
**Alexander et al- Ensen**

| Plasmid                        | Primers                                                                                                                                                                                            |
|--------------------------------|----------------------------------------------------------------------------------------------------------------------------------------------------------------------------------------------------|
| HA-FAK-Nter (1-402)            | Forward primer:<br>5'CATCTAGCAAAGAATGGCTGCAGCATATCCATACGACGTCCCGGACT<br>ACGCAGCTGCTTATCTTGA-3'<br>Reverse primer:<br>5'-TCAAGATAAGCAGCTGCGTAGTCCGGGACGTCGTATGGATATGCTGC<br>AGCCATTCTTTTGCTAGATG-3' |
| HA-FAK-ΔNter                   | Forward primer:<br>5'CACAGAATTCATGTATCCATACGACGTCCCGGACTACGCCGAGGAAGACACAA<br>C-3'<br>Reverse primer: 5'-ACCTGGTACCCACCCGATCCAGAG-3'                                                               |
| HA-FAK(376-1055)               | Forward primer: 5'-GCACGGAATTCCTTTGGCCAACAATGAAAAGC-3'<br>Reverse primer: 5'-CGGCGGTACCAGAGTTTTCTGAACAC-3'                                                                                         |
| RlucII-FAK                     | Forward primer: 5'-GAACCGGTGCGCCACCATGAC-3'<br>Reverse primer: 5'-GAGATCCGGACTGCTCGTTCTT-3'                                                                                                        |
| RlucII-FAKY397F                | Forward primer: 5'-GAGACAGATGACTTTGCCGAGATCG -3'<br>Reverse primer: 5'-CGATCTCGGCAAAGTCATCTGTCTC-3'                                                                                                |
| FAK-RLucII                     | Forward primer : 5'-GATCCGCTAGCATGGCAGCTGCTTATC-3'<br>Reverse primer : 5'-ATATGGTACCGTGTGGCCGTGTCTG-3'                                                                                             |
| Gal4 AD FAK                    | Forward primer: 5'-TCGGGATCCTTGCTGCTTATCTT-3'<br>Reverse primer: 5'-GGTGGATCCAGAGTTTTCTGAA-3'                                                                                                      |
| Gal4 AD FAK-Nter               | Forward primer: 5'-TCGGGATCCTTGCTGCTTATCTT 3'<br>Reverse primer: 5'-GAAGGATCCTTAATCGATGATCTCGGCA-3'                                                                                                |
| Gal4 AD FAK-ΔNter              | Forward primer: 5'-GGAGAATTCGAGGAAGACACATA-3'<br>Reverse primer: 5'-GGTGGATCCAGAGTTTTCTGAA-3'                                                                                                      |
| β-arrΔAP-2-GFP10               | Forward primer: 5'-ACTTTGCCCGGCTTGCGCTGAAGGGGATG-3'<br>Reverse primer: 5'-CATCCCCTTCAGCGCAAGCCGGGCAAAGT-3'                                                                                         |
| mCherry-β-arrΔAP-2             | Forward primer: 5'-GAGGACTTTGCCCGGCTTGCGCTTAAGGGGATGAAGGATG-3'<br>Reverse primer: 5'-CATCCTTCATCCCCTTAAGCGCAAGCCGGGCAAAGTCCTC-3'                                                                   |
| HA-AT <sub>1A</sub> R (DRY/AA) | Forward primer: 5'-TGTCTCAGCATCGCCGCTACCTGGCCATC-3'<br>Reverse primer: 5'-GATGGCCAGGTAGGCGGCGATGCTGAGACA-3'                                                                                        |

**Supplementary Table 1.** PCR Primers used to construct the different plasmids mentioned in the Methods section
